# Supplementary material for: Reversible borohydride formation from aluminium hydrides and {H(9-BBN)}2: structural, thermodynamic and reactivity studies
Source: Royal Society of Chemistry journal article supplement (doi:10.1039/c9dt00535h), 2019-01-01

**Reversible borohydride formation from aluminium hydrides and {H(9-BBN)}<sub>2</sub>:  
structural, thermodynamic and reactivity studies**

Alexa Caise, Eugene L. Kolychev, Jamie Hicks, M. Ángeles Fuentes, Jose M. Goicoechea  
and Simon Aldridge

**Supporting Information**

Contents (9 pages total)

- |    |                                                                   |    |
|----|-------------------------------------------------------------------|----|
| 1. | Variable temperature NMR experiments                              | s2 |
| 2. | <sup>1</sup> H and <sup>13</sup> C NMR spectra of novel compounds | s4 |

## 1. Variable temperature NMR experiments

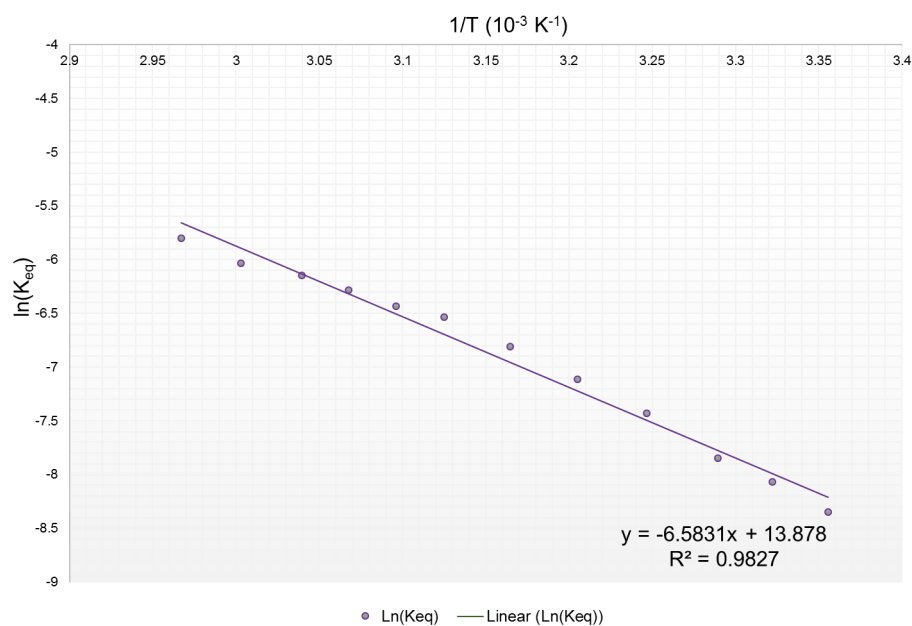

Figure s1: A Van't Hoff plot for the dissociation of the borane from  $[\text{Dipp1}]\text{Al}(\text{Et})\{\text{H}_2(9\text{-BBN})\}$ . Temperature range from 295 K to 345 K.

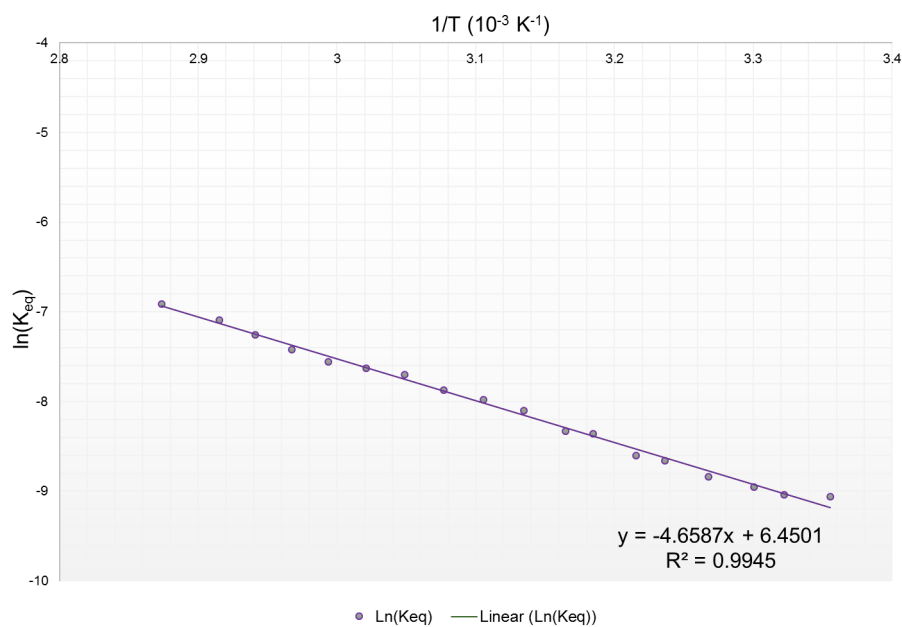

Figure s2: A Van't Hoff plot for the dissociation of the borane from  $[\text{Dipp1}]\text{Al}(\text{Me})\{\text{H}_2(9\text{-BBN})\}$ . Temperature range from 295 K to 358 K.

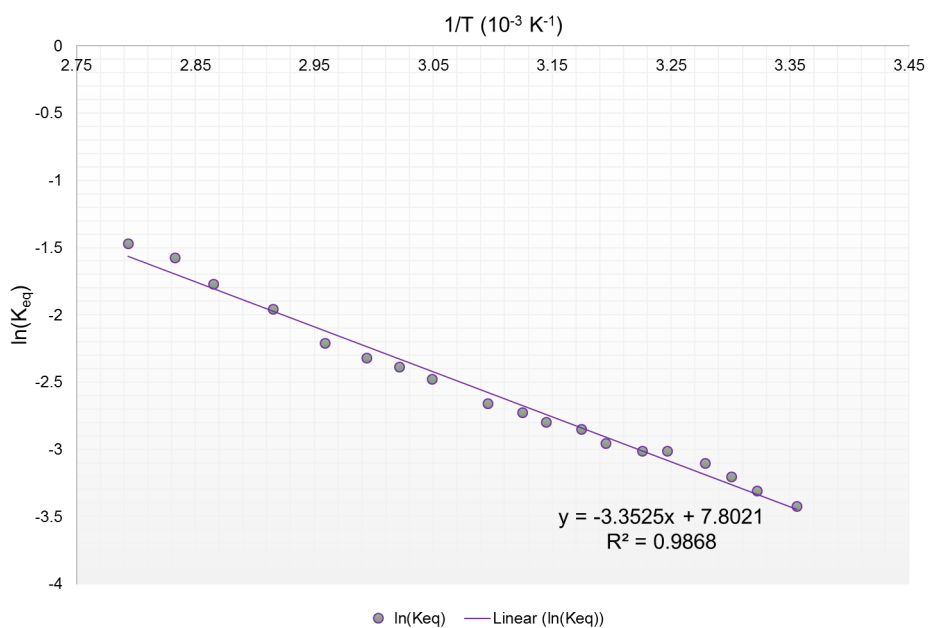

Figure s3: A Van't Hoff plot for the dissociation of the borane from  $[\text{Dipp1}]\text{Al}(\text{OTf})\{\text{H}_2(9\text{-BBN})\}$ . Temperature range from 298 K to 333 K.

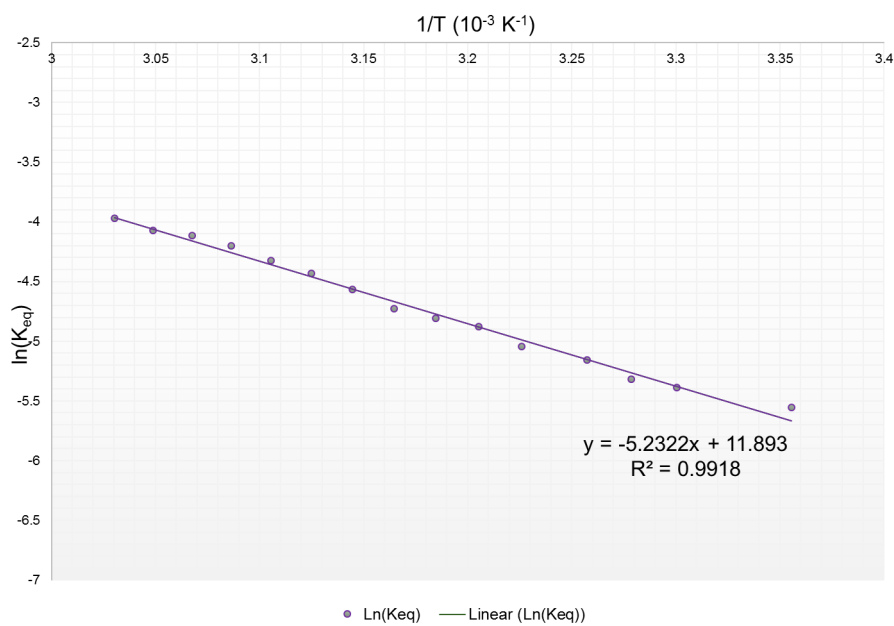

Figure s4: A Van't Hoff plot for the dissociation of the borane from  $[\text{Dipp2}]\text{Al}(\text{Et})\{\text{H}_2(9\text{-BBN})\}$ . Temperature range from 298 K to 333 K.

## 2. $^1\text{H}$ and $^{13}\text{C}$ NMR spectra of novel compounds

### $[\text{Dipp}^1]\text{Al}(\text{Et})\{\text{H}_2(9\text{-BBN})\}$

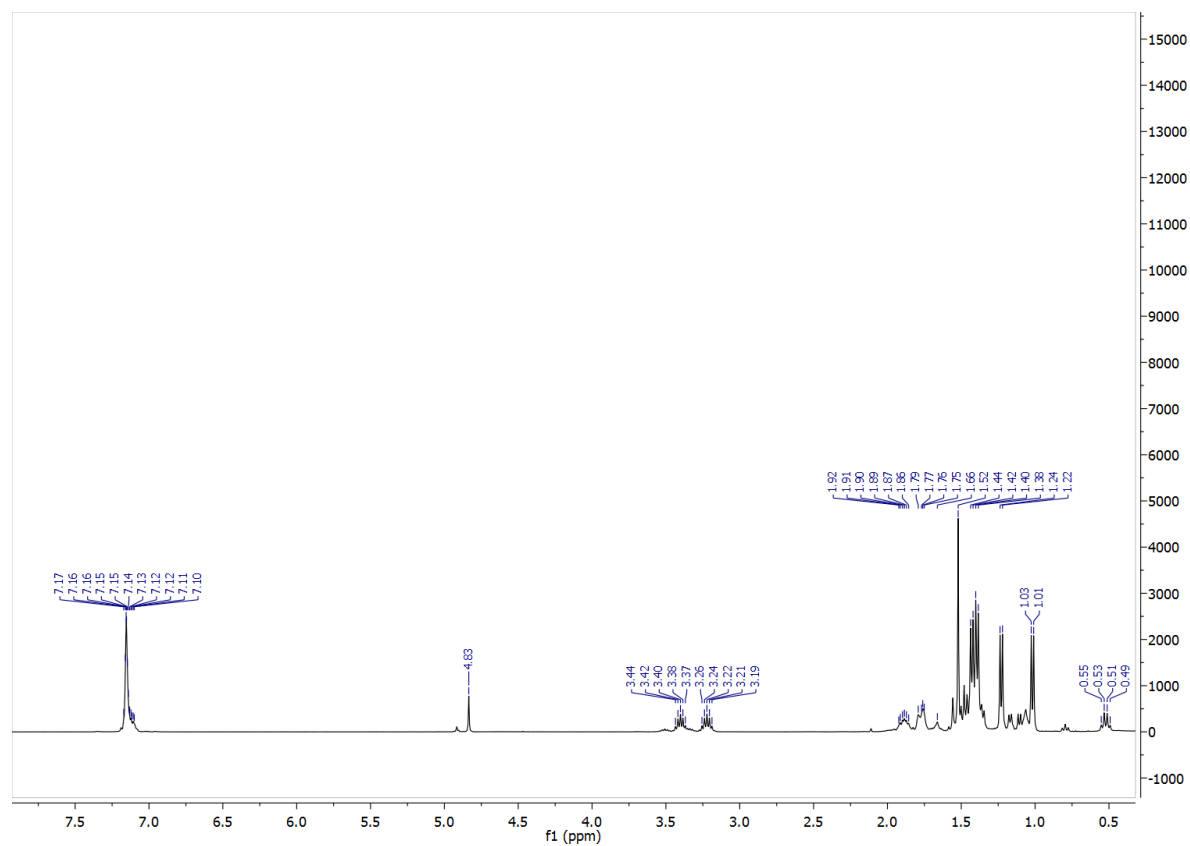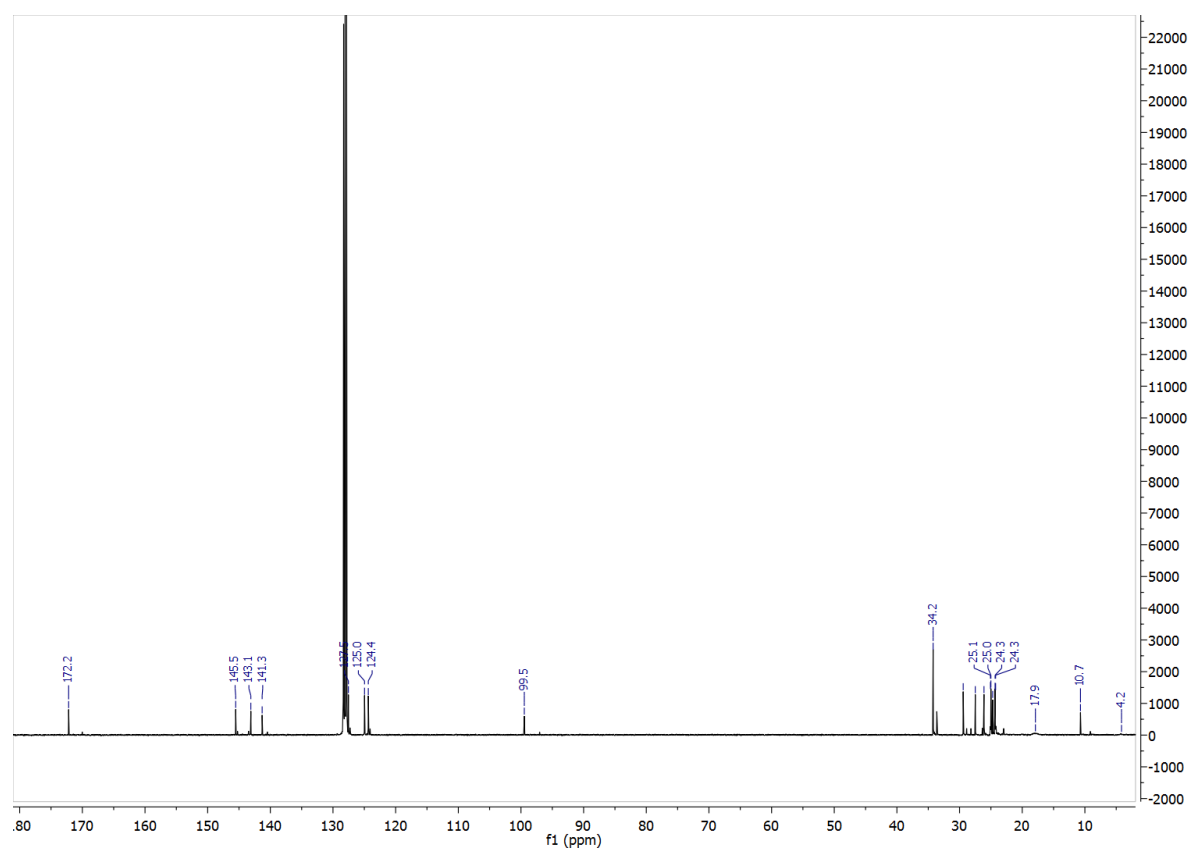

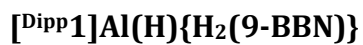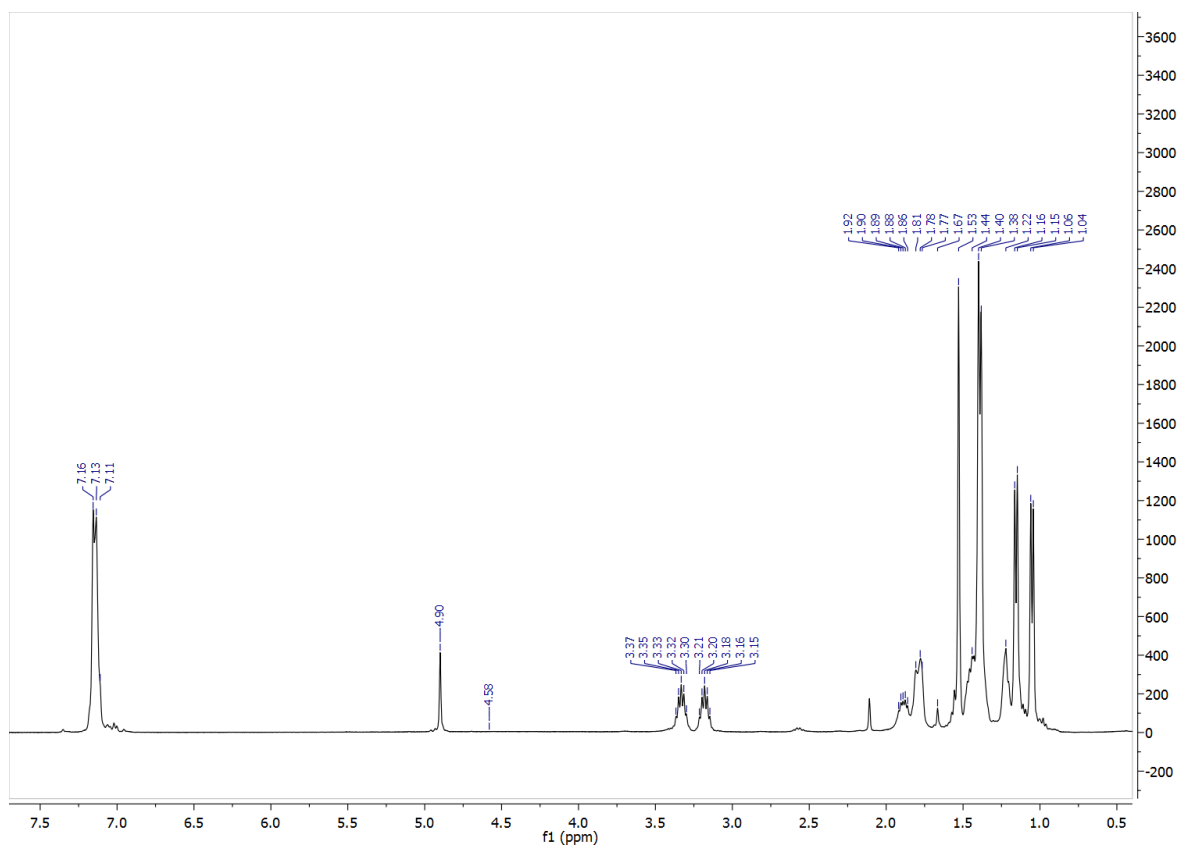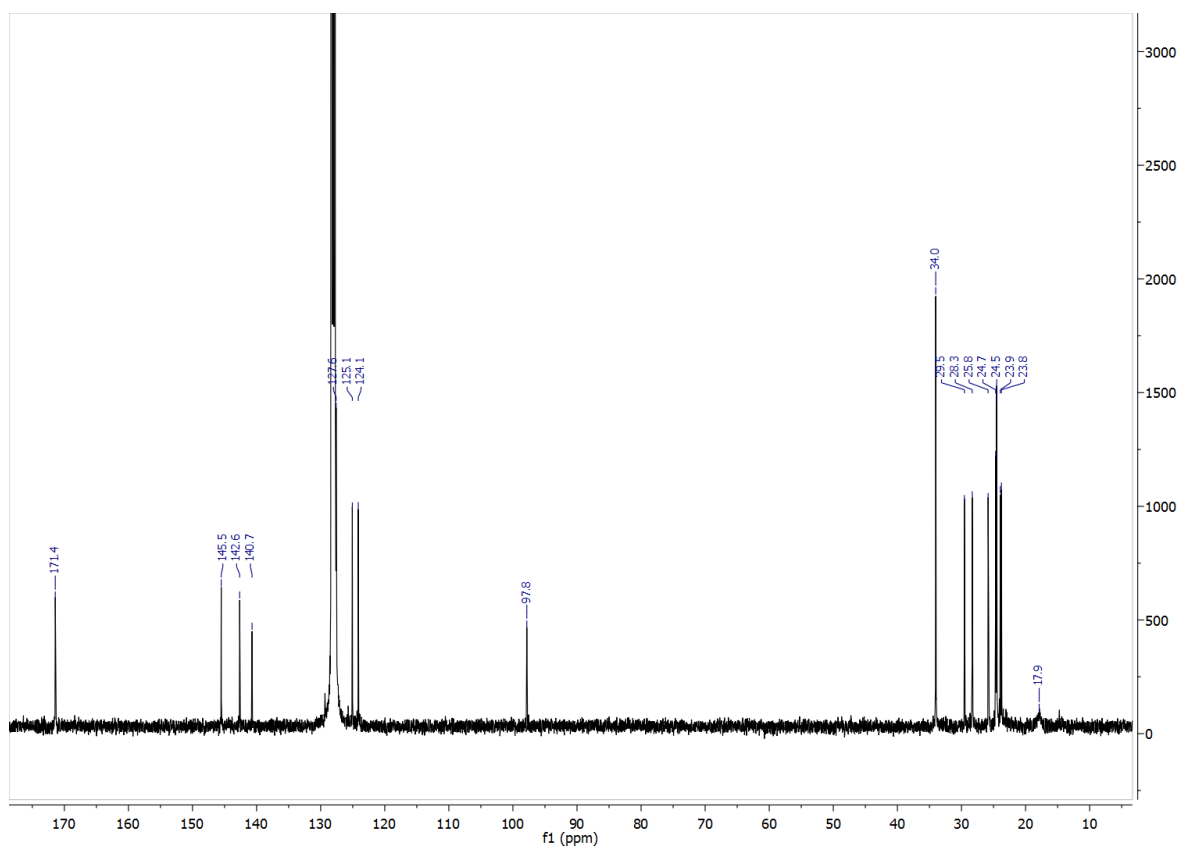

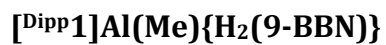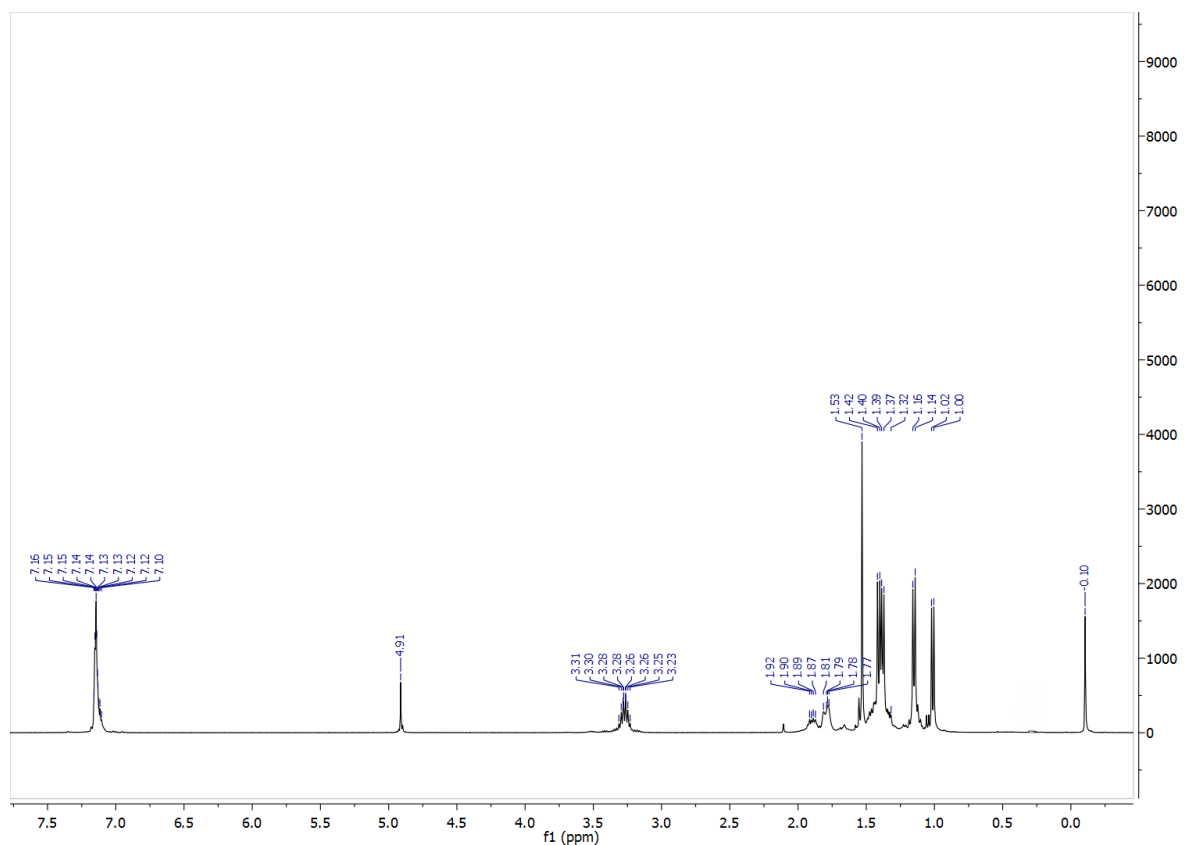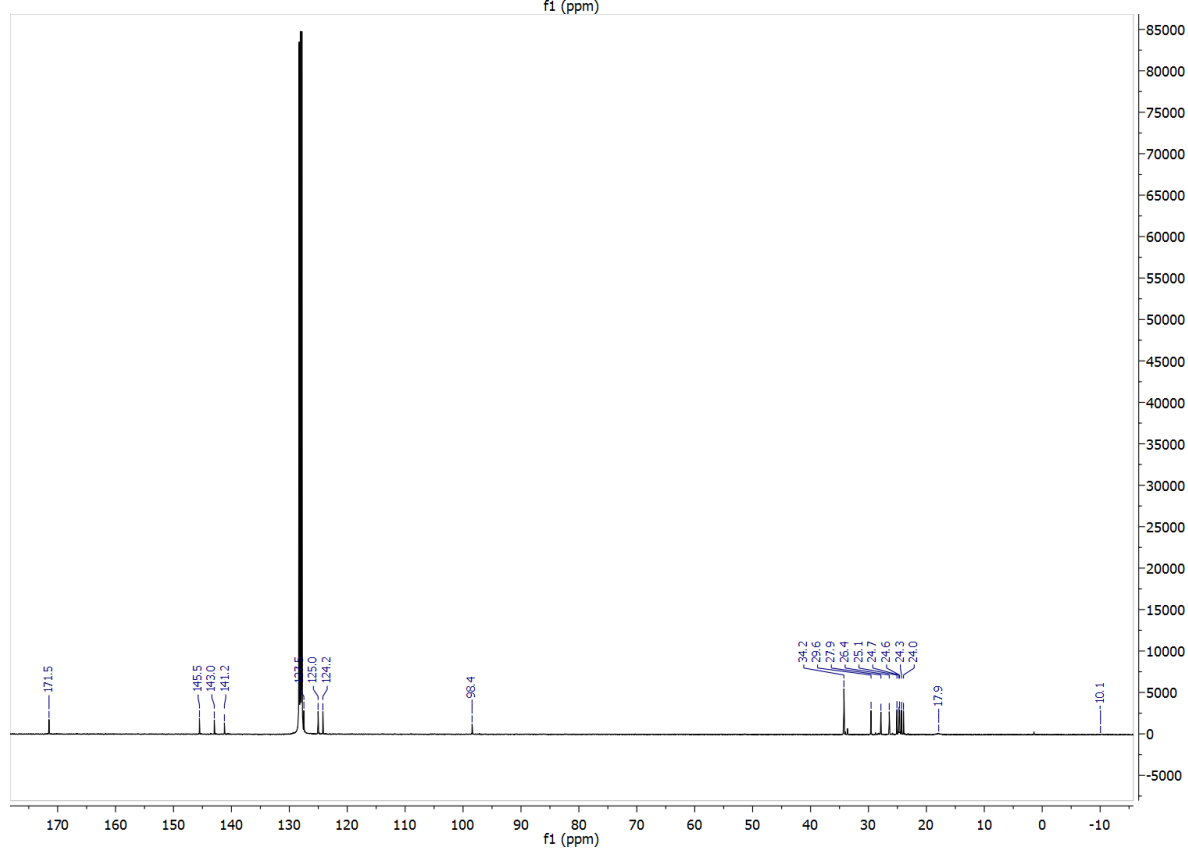

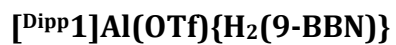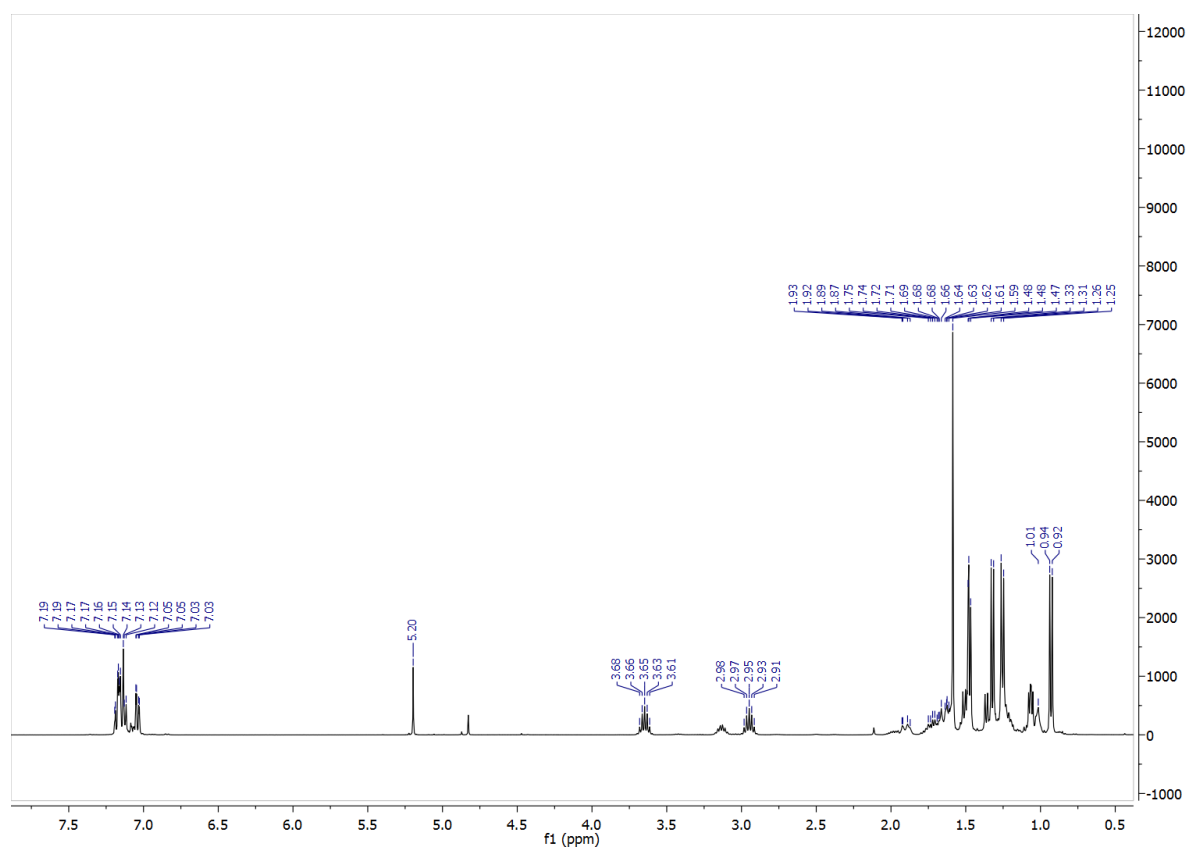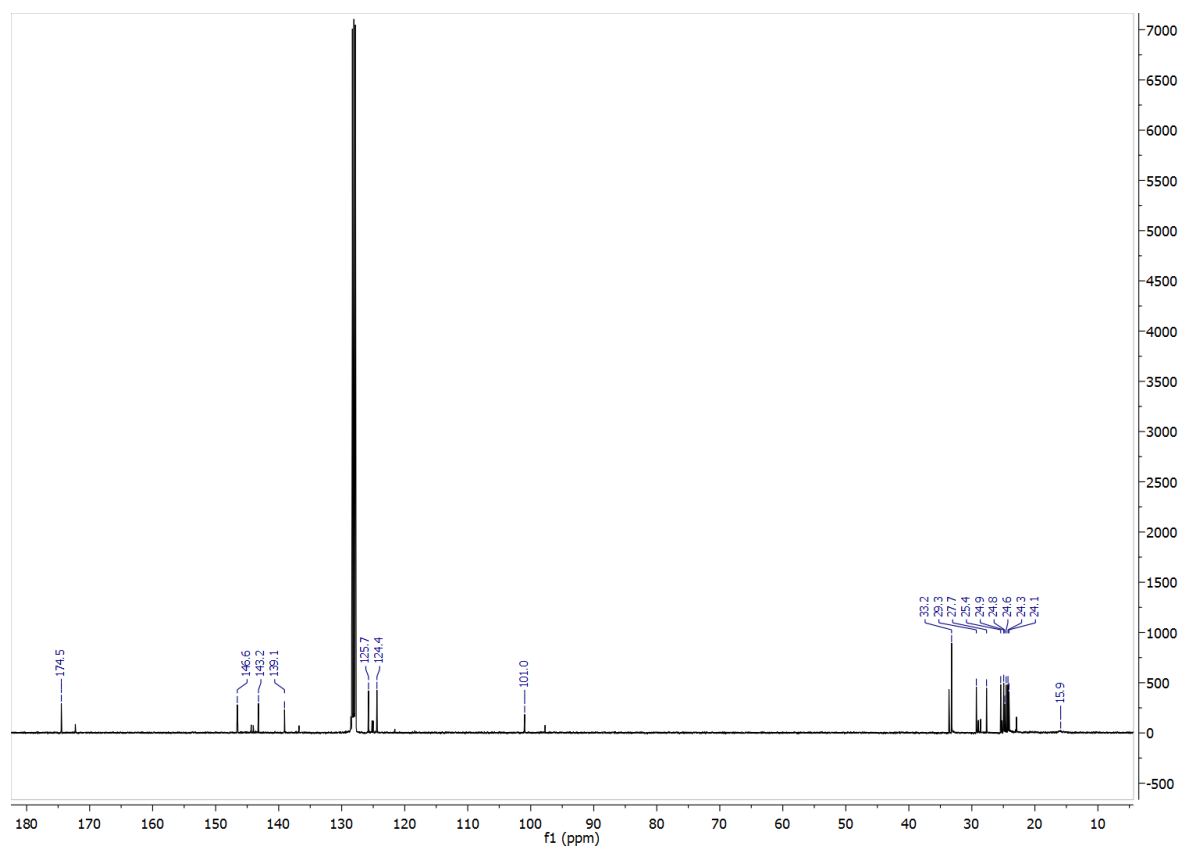

**[Dipp<sub>2</sub>]Al(Et){H<sub>2</sub>(9-BBN)}**

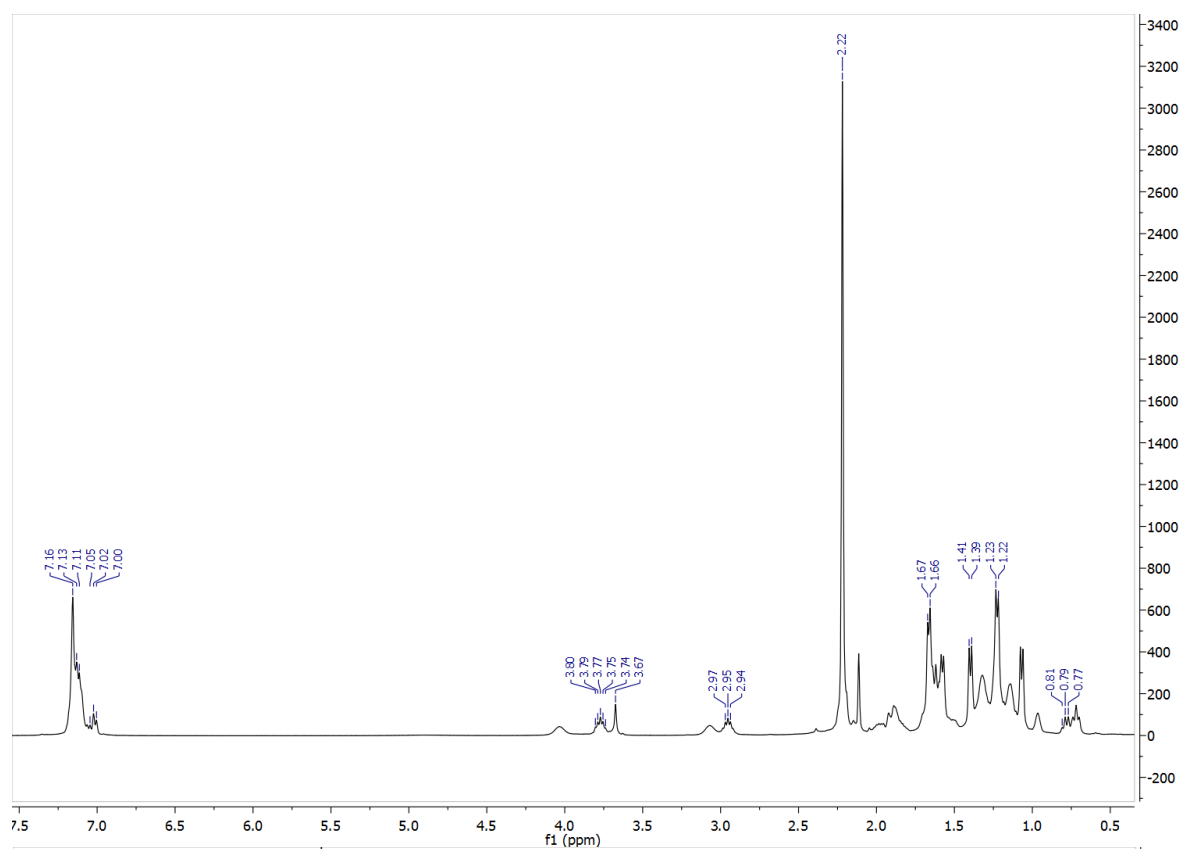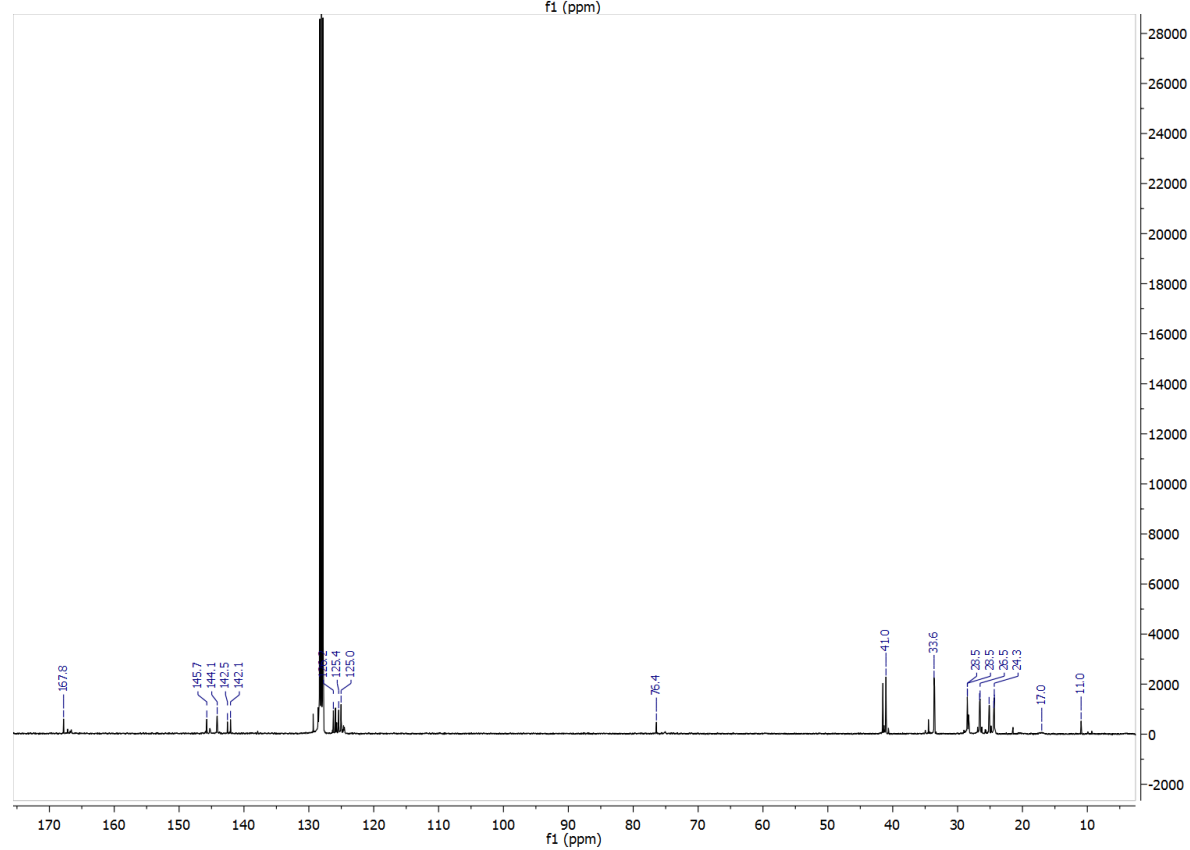



**[Dipp<sub>2</sub>]Al(H){H<sub>2</sub>(9-BBN)}**

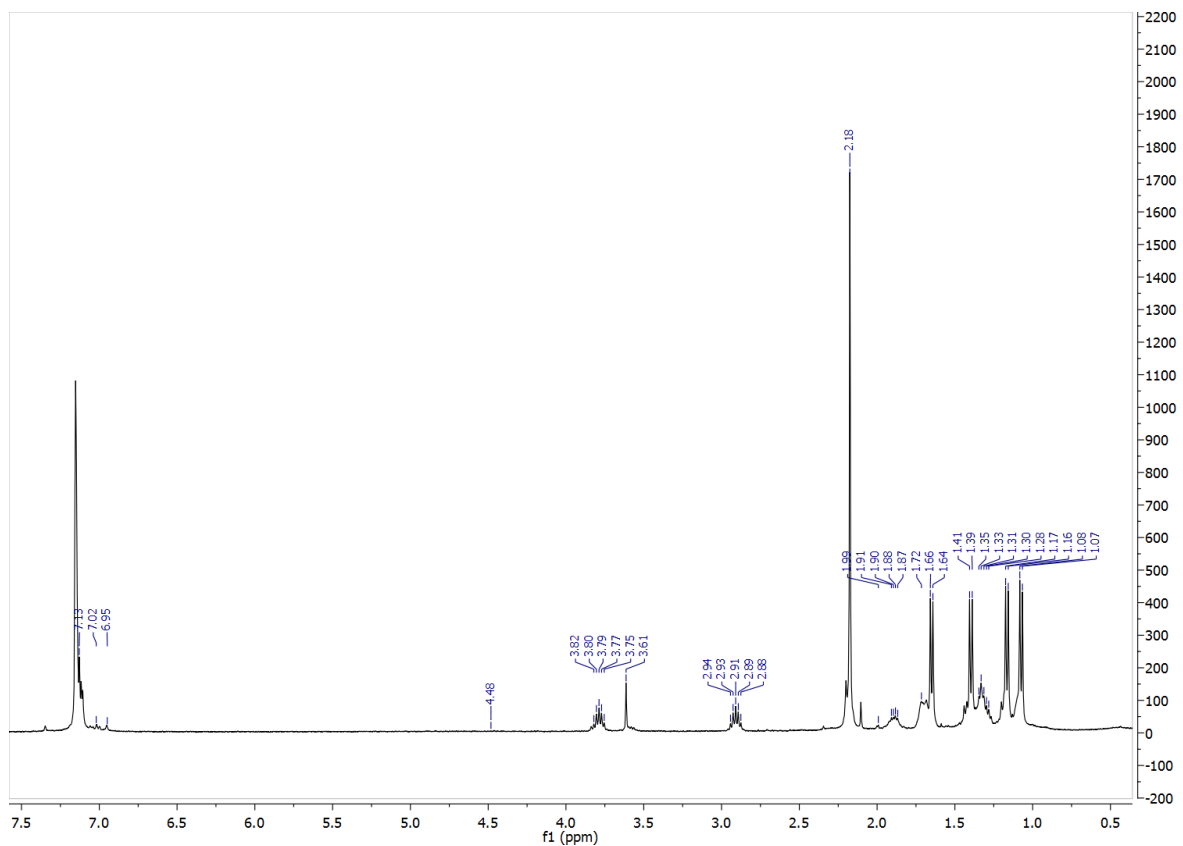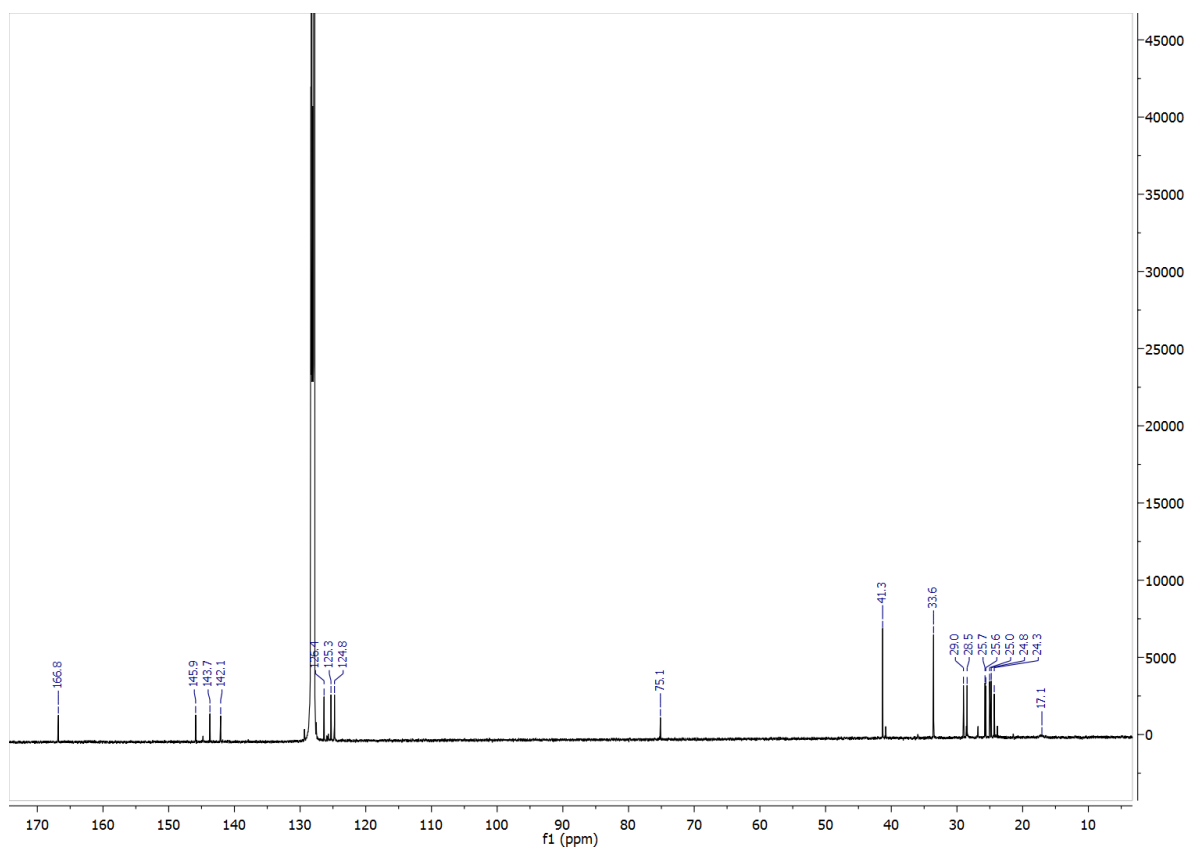

Supplement: c9dt00535h1.pdf [file c9dt00535h1.pdf]
